# Supplementary material for: Mutations in DARS2 result in global dysregulation of mRNA metabolism and splicing
Source: PubMed Central journal article supplement (PMC10415389; doi:10.1038/s41598-023-40107-7), 2023-08-10
Supplement: 41598_2023_40107_MOESM1_ESM.pdf [file 41598_2023_40107_MOESM1_ESM.pdf]

SUPPLEMENTAL DATA

**Mutations in *DARS2* result in global dysregulation of mRNA metabolism and splicing**

Guang S<sup>1,2</sup>, O'Brien BM<sup>1</sup>, Fine AS<sup>3</sup>, Ying, M<sup>2,4</sup>, Fatemi A<sup>1,2</sup>, Nemeth CL<sup>1,2\*</sup>

<sup>1</sup>Moser Center for Leukodystrophies at Kennedy Krieger, Kennedy Krieger Institute, Baltimore, MD, USA;

<sup>2</sup>Department of Neurology, Johns Hopkins University School of Medicine, Baltimore, MD, USA;

<sup>3</sup>Department of Neurology and Developmental Medicine, Kennedy Krieger Institute, Baltimore, MD, USA

<sup>4</sup>Department of Neurology, Kennedy Krieger Institute, Baltimore, MD, USA

\*Corresponding Author:

Christina Nemeth Mertz, PhD  
Kennedy Krieger Institute  
707 N Broadway  
Baltimore, MD 21205  
667-205-4288 (p)  
443-923-2695 (f)  
Mertz@kennedykrieger.org

SUPPLEMENTAL DATA

**Supplemental Table 1. Primers used for DARS2 exon 3 inclusion/exclusion**

| Experiments                             | Primers   | Primer sequence (5'-3') | Primer length (bp) |
|-----------------------------------------|-----------|-------------------------|--------------------|
| PCR                                     | E2A-fwd   | GTGGAGAGTTGCGTTCGTCT    | 20                 |
|                                         | E4-rev    | AGGACGGGAAATGACTGTACC   | 21                 |
| RT-qPCR<br>(Transcripts with exon 3)    | E2A-fwd   | GTGGAGAGTTGCGTTCGTCT    | 20                 |
|                                         | E3_4-rev  | TGAACAAGCCCATCGAAATCTC  | 22                 |
| RT-qPCR<br>(Transcripts without exon 3) | E2B-fwd   | CCAACACATGTGGAGAGTTGC   | 21                 |
|                                         | E2_4-rev  | TTCAGTACCGAAGTCGGCAG    | 20                 |
|                                         | PPIA-fwd  | GTCAACCCACCGTGTCT       | 19                 |
| RT-qPCR<br>(Housekeeping genes)         | PPIA-rev  | CTGCAAACAGCTCAAAGGAGAC  | 22                 |
|                                         | PSMB4-fwd | CGTCCACTCCCGATTCTTC     | 20                 |
|                                         | PSMB4-rev | AATGCGAGAGATGTTGCGGA    | 20                 |

**Supplemental Table 2. Top 20 significant DTU genes in two groups of LBSL cells**

| Gene                                       | # Transcripts Detected | # Sig Transcripts | Gene Overall FDR | Min Transcript OFDR | Max DTU Difference | Chr | % Cells Expressing |
|--------------------------------------------|------------------------|-------------------|------------------|---------------------|--------------------|-----|--------------------|
| <b>MIS LBSL cells VS. Control cells</b>    |                        |                   |                  |                     |                    |     |                    |
| <i>SLIRP</i>                               | 9                      | 2                 | 1.85E-78         | 1.58E-86            | 0.173              | 14  | 0.973              |
| <i>TPD52L1</i>                             | 12                     | 3                 | 1.16E-67         | 1.67E-57            | 0.085              | 6   | 0.905              |
| <i>MORF4L1</i>                             | 11                     | 3                 | 3.51E-57         | 1.16E-20            | -0.158             | 15  | 0.991              |
| <i>TRIM22</i>                              | 8                      | 3                 | 6.66E-50         | 2.10E-38            | -0.464             | 11  | 0.606              |
| <i>STMN1</i>                               | 5                      | 3                 | 8.92E-47         | 2.61E-50            | 0.241              | 1   | 0.943              |
| <i>SEPTIN7</i>                             | 10                     | 3                 | 3.73E-45         | 2.63E-18            | 0.084              | 7   | 0.900              |
| <i>GPI</i>                                 | 10                     | 4                 | 9.21E-42         | 5.47E-11            | -0.066             | 19  | 0.896              |
| <i>RAB1A</i>                               | 4                      | 3                 | 1.07E-40         | 1.26E-39            | 0.166              | 2   | 0.953              |
| <i>RBIS</i>                                | 12                     | 3                 | 7.53E-39         | 1.36E-32            | 0.196              | 8   | 0.764              |
| <i>WSB1</i>                                | 12                     | 1                 | 3.31E-38         | 3.02E-23            | -0.159             | 17  | 0.975              |
| <i>ZFYVE16</i>                             | 13                     | 3                 | 3.39E-37         | 9.17E-19            | -0.126             | 5   | 0.912              |
| <i>CALCOCO2</i>                            | 19                     | 1                 | 1.44E-35         | 2.78E-20            | 0.094              | 17  | 0.712              |
| <i>AKAP8L</i>                              | 20                     | 3                 | 1.54E-34         | 8.89E-06            | 0.092              | 19  | 0.667              |
| <i>IFITM2</i>                              | 10                     | 3                 | 2.34E-34         | 5.73E-17            | -0.198             | 11  | 0.873              |
| <i>SNRPN</i>                               | 9                      | 2                 | 1.71E-32         | 1.73E-22            | -0.101             | 15  | 0.971              |
| <i>GLUL</i>                                | 7                      | 2                 | 7.12E-32         | 1.22E-27            | 0.127              | 1   | 0.912              |
| <i>SNX3</i>                                | 4                      | 2                 | 1.97E-31         | 3.94E-23            | -0.150             | 6   | 0.948              |
| <i>MYO10</i>                               | 12                     | 4                 | 2.01E-30         | 9.14E-09            | 0.100              | 5   | 0.943              |
| <i>CLU</i>                                 | 9                      | 1                 | 1.41E-29         | 2.33E-17            | -0.050             | 8   | 0.973              |
| <i>JTB</i>                                 | 5                      | 4                 | 1.69E-29         | 4.67E-23            | -0.197             | 1   | 0.950              |
| <b>SPLICE LBSL cells VS. Control cells</b> |                        |                   |                  |                     |                    |     |                    |
| <i>MAGED2</i>                              | 8                      | 2                 | 1.07E-116        | 1.35E-121           | 0.288              | X   | 0.894              |
| <i>IFITM2</i>                              | 10                     | 6                 | 4.47E-91         | 3.55E-43            | -0.3296            | 11  | 0.826              |
| <i>SULF1</i>                               | 16                     | 4                 | 1.82E-68         | 6.92E-22            | 0.187              | 8   | 0.807              |
| <i>SCOC</i>                                | 4                      | 2                 | 3.90E-62         | 7.21E-64            | 0.196              | 4   | 0.853              |
| <i>GAPDH</i>                               | 2                      | 2                 | 5.25E-60         | 0                   | -0.114             | 12  | 0.995              |
| <i>GNAS</i>                                | 21                     | 2                 | 1.41E-56         | 3.17E-08            | 0.239              | 20  | 0.909              |

## SUPPLEMENTAL DATA

---

|                            |     |   |          |          |        |    |       |
|----------------------------|-----|---|----------|----------|--------|----|-------|
| <i>RPL29</i>               | 4   | 2 | 1.04E-54 | 1.24E-53 | 0.243  | 3  | 0.977 |
| <i>ITM2B</i>               | 5   | 2 | 3.56E-54 | 2.05E-37 | -0.129 | 13 | 0.985 |
| <i>RPL9</i>                | 6   | 2 | 3.36E-53 | 6.84E-34 | 0.048  | 4  | 0.983 |
| <i>GOLGA8B</i>             | 10  | 3 | 1.14E-49 | 5.84E-48 | -0.202 | 15 | 0.683 |
| <i>SF3B2</i>               | 110 | 4 | 1.88E-46 | 1.64E-28 | 0.317  | 11 | 0.844 |
| <i>YWHAZ</i>               | 15  | 2 | 3.18E-44 | 2.47E-23 | 0.179  | 8  | 0.878 |
| <i>CALM2</i>               | 15  | 2 | 9.97E-42 | 8.27E-22 | 0.150  | 2  | 0.990 |
| <i>HNRNPC</i>              | 13  | 3 | 7.35E-41 | 7.59E-15 | -0.093 | 14 | 0.948 |
| <i>NDUFB5</i>              | 11  | 1 | 7.02E-39 | 1.42E-37 | 0.076  | 3  | 0.929 |
| <i>RPL17-<br/>C18orf32</i> | 3   | 3 | 2.54E-38 | 8.16E-39 | 0.194  | 18 | 0.932 |
| <i>EIF4G2</i>              | 12  | 2 | 7.91E-37 | 1.91E-24 | 0.165  | 11 | 0.954 |
| <i>CKB</i>                 | 7   | 3 | 5.21E-36 | 3.81E-25 | -0.266 | 14 | 0.905 |
| <i>RPL10</i>               | 7   | 2 | 9.59E-36 | 1.13E-41 | 0.188  | X  | 0.958 |
| <i>CYCS</i>                | 4   | 2 | 2.15E-33 | 3.90E-36 | -0.153 | 7  | 0.960 |

---

SUPPLEMENTAL DATA

**Supplemental Table 3. LBSL Associated Differentially Spliced Exons**

| DSE genes               | Chr | 5' adjacent exon    | DSE exon            | 3' adjacent exon    | cell_coeff | FDR      |
|-------------------------|-----|---------------------|---------------------|---------------------|------------|----------|
| <i>LGMN.AS2</i>         | 14  | 92703807-92704361   | 92704640-92704707   | 92709672-92709872   | 8.724      | 3.34E-43 |
| <i>PDCD4</i>            | 10  | 110871795-110872018 | 110875966-110876070 | 110881233-110881535 | -3.554     | 4.97E-15 |
| <i>TARDBP.AS</i>        | 1   | 11013716-11013965   | 11016844-11017007   | 11018733-11018873   | 4.871      | 1.79E-12 |
| <i>UBE2VI</i>           | 20  | 50081124-50082914   | 50084129-50084254   | 50096672-50096820   | -3.844     | 6.88E-12 |
| <i>KARSI</i>            | 16  | 75635912-75636098   | 75636454-75636547   | 75641564-75641723   | 3.688      | 1.29E-10 |
| <i>NDUFS7</i>           | 19  | 1383900-1383942     | 1386518-1386639     | 1387811-1387847     | -5.339     | 8.41E-09 |
| <i>NASP.AS2</i>         | 1   | 45591223-45591270   | 45606482-45606591   | 45613169-45613248   | 2.526      | 1.41E-07 |
| <i>MIA2</i>             | 14  | 39319209-39319291   | 39320928-39321056   | 39326864-39327022   | -3.392     | 2.32E-07 |
| <i>HAGH</i>             | 16  | 1817168-1817271     | 1819115-1819223     | 1819897-1820014     | -2.416     | 5.29E-07 |
| <i>RP11-</i>            | 15  | 68197440-68197628   | 68199541-68199681   | 68205121-68205151   | -3.22      | 5.31E-07 |
| <i>MIF4GD</i>           | 17  | 75267538-75267630   | 75268083-75268192   | 75270114-75270245   | -3.45      | 7.73E-07 |
| <i>FNTA</i>             | 8   | 43056308-43056546   | 43064101-43064215   | 43069555-43069659   | -3.053     | 2.52E-06 |
| <i>SRP72</i>            | 4   | 56478592-56478649   | 56483139-56483270   | 56484736-56484864   | 2.571      | 3.40E-06 |
| <i>GALNT10</i>          | 5   | 154329572-154329738 | 154376277-154376462 | 154380448-154380631 | 6.409      | 4.22E-06 |
| <i>COX7B</i>            | X   | 77899440-77899593   | 77901744-77901867   | 77902643-77902767   | 1.636      | 6.91E-06 |
| <i>PIFO</i>             | 1   | 111346910-111347049 | 111347674-111347772 | 111348516-111348646 | -2.052     | 7.15E-06 |
| <b><i>DARS2.AS2</i></b> | 1   | 173826687-173826786 | 173828333-173828399 | 173830660-173830761 | -6.781     | 7.99E-06 |
| <i>NUCB2.AS2</i>        | 11  | 17312028-17312120   | 17315386-17315475   | 17330127-17330297   | -2.757     | 2.63E-05 |
| <i>EXOC5</i>            | 14  | 57239595-57239659   | 57244165-57244359   | 57246711-57246858   | -4.015     | 6.46E-05 |
| <i>CLYBL</i>            | 13  | 99858861-99859049   | 99862991-99863092   | 99864818-99864911   | -4.974     | 9.54E-05 |

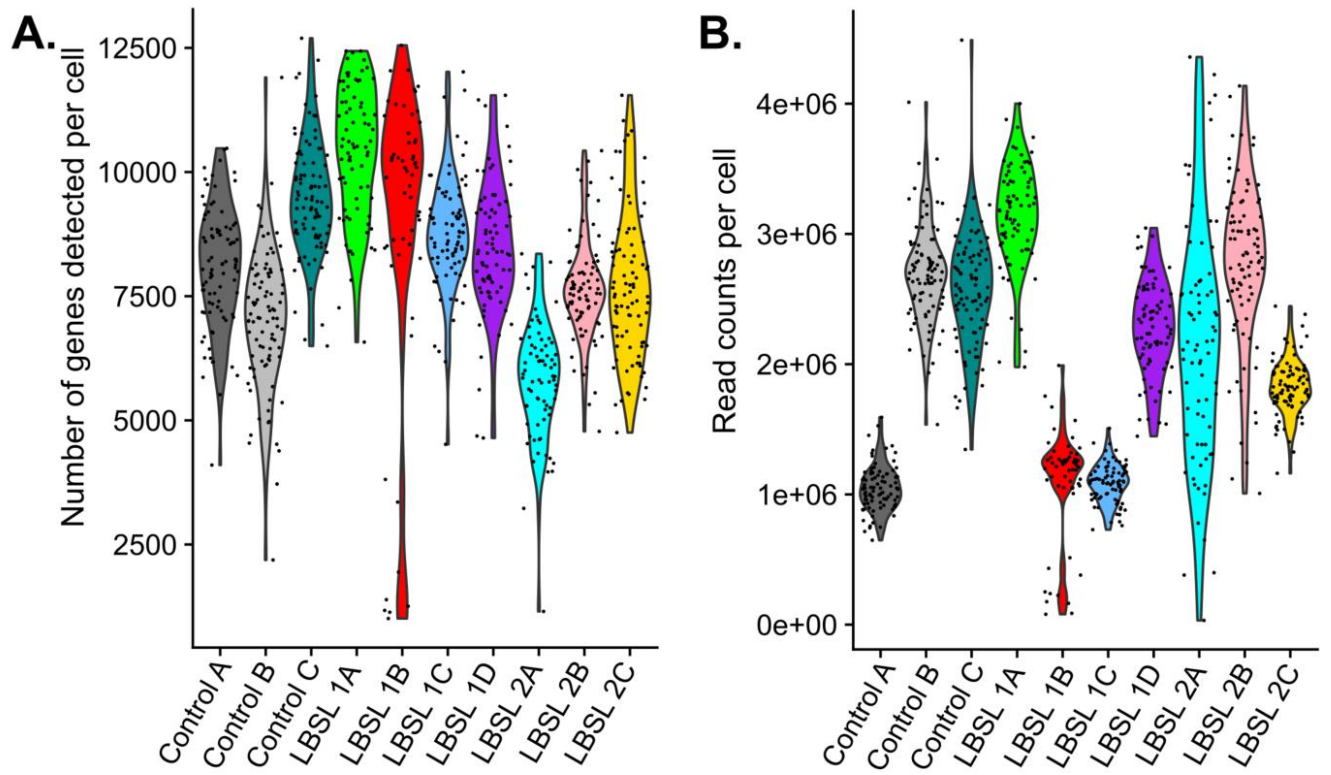

**Supplemental Figure 1.** Violin plots after quality control. (A) Number of genes detected per cell (> 1000) for each cell line. (B) Read counts per cell indicated by cell line.

SUPPLEMENTAL DATA

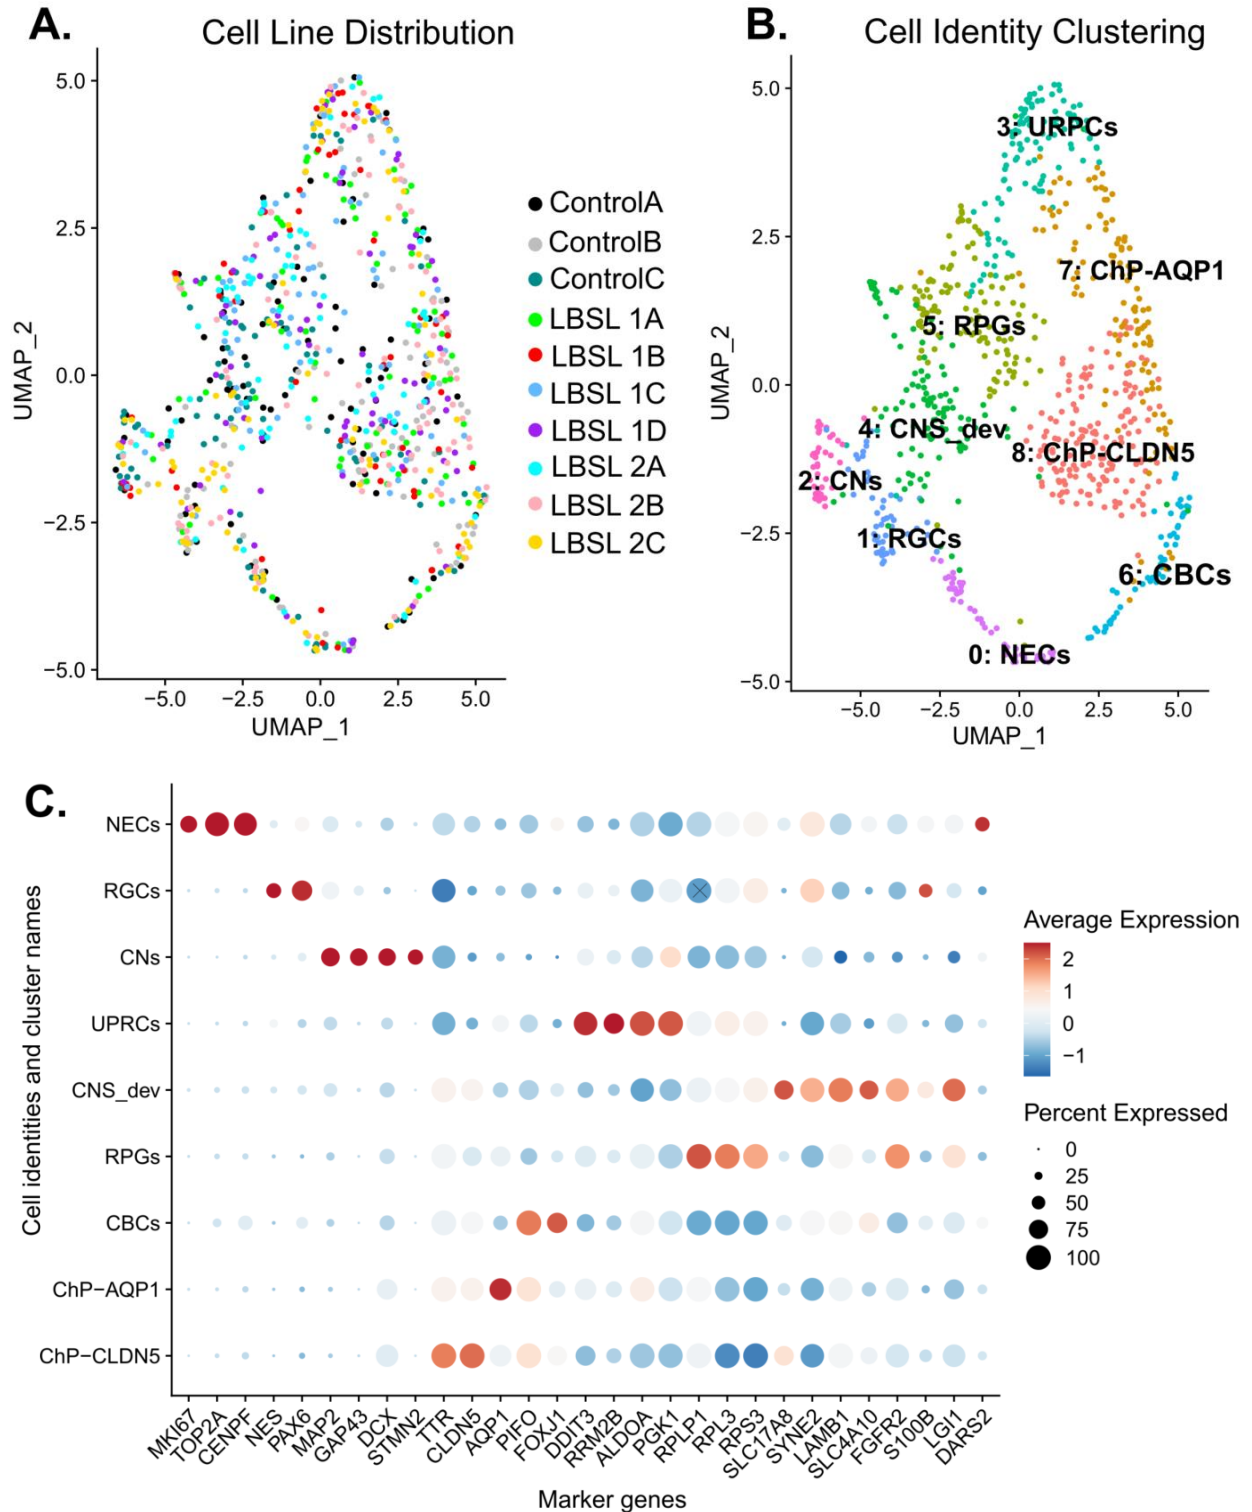

**Supplemental Figure 2.** Unsupervised clustering and dimension reduction by Uniform Manifold Approximation and Projection (UMAP). (A) Cells from different cell lines were intermixed without an obvious batch effect. (B) Nine transcriptionally distinct clusters were detected. (C)

## SUPPLEMENTAL DATA

Dot plot of marker genes to identify each cell cluster. NECs: neuroepithelial cells; RGCs: radial glial cells; CNs: cortical neurons; UPRCs: unfolded protein response-related cells; CNS\_dev: cells related to the development of CNS; RPGs: cells highly expressing ribosomal protein genes; CBCs: cilium bearing cells; ChP: choroid plexus.



SUPPLEMENTAL DATA

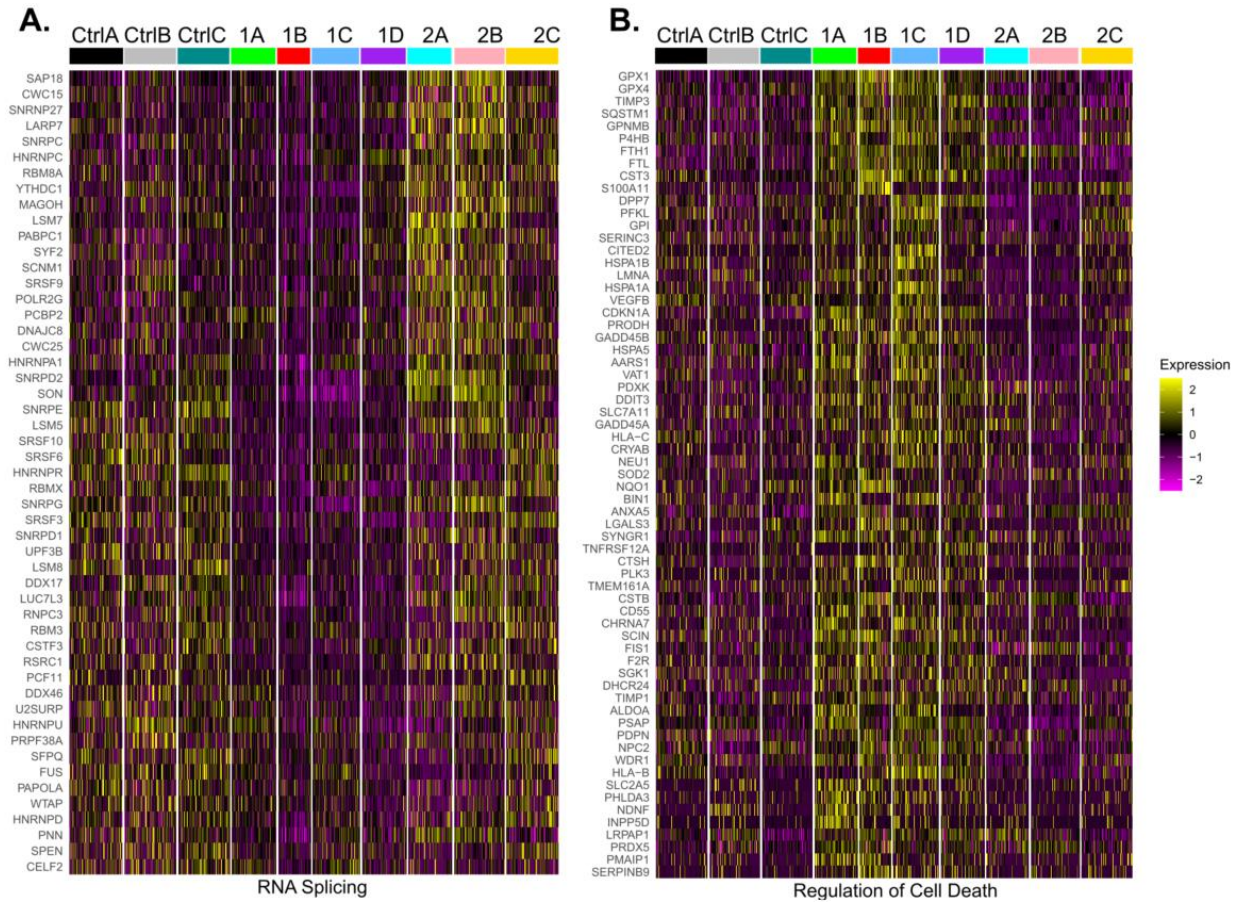

**Supplemental Figure 3.** Heatmaps of DEGs under the GO terms “RNA splicing” (A) and “Regulation of cell death” (B).

SUPPLEMENTAL DATA

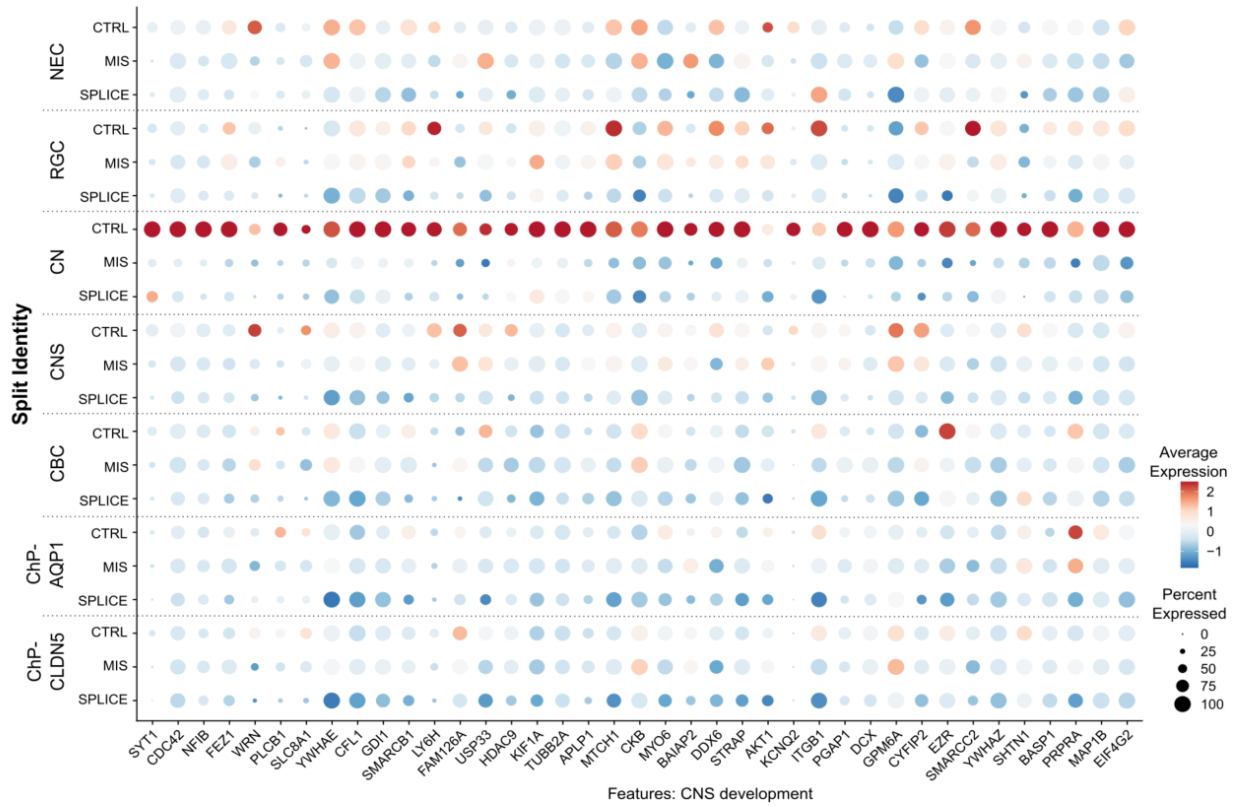

**Supplemental Figure 4.** Dot plot of DEGs related to CNS development and neuronal differentiation.

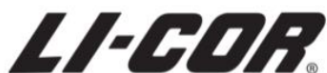

Image ID: 0004804\_02  
 Acquire Time: Mar 5, 2020 3:25:19 PM

Acquisition Information

| # | Image ID   | Acquire Time           | Channels | Resolution | Intensities | Quality | Analysis | Image Name | Comment |
|---|------------|------------------------|----------|------------|-------------|---------|----------|------------|---------|
| 1 | 0004804_02 | Mar 5, 2020 3:25:19 PM | 700 800  | 169um      | 3.0 3.0     | medium  | Manual   | 0004804_02 |         |

Image Display Values

| Channel | Color                       | Minimum | Maximum | K |
|---------|-----------------------------|---------|---------|---|
| 700     | Gray Scale (Black on White) | 5.26    | 6480    | 0 |
| 800     | Gray Scale (Black on White) | 0.437   | 6700    | 0 |

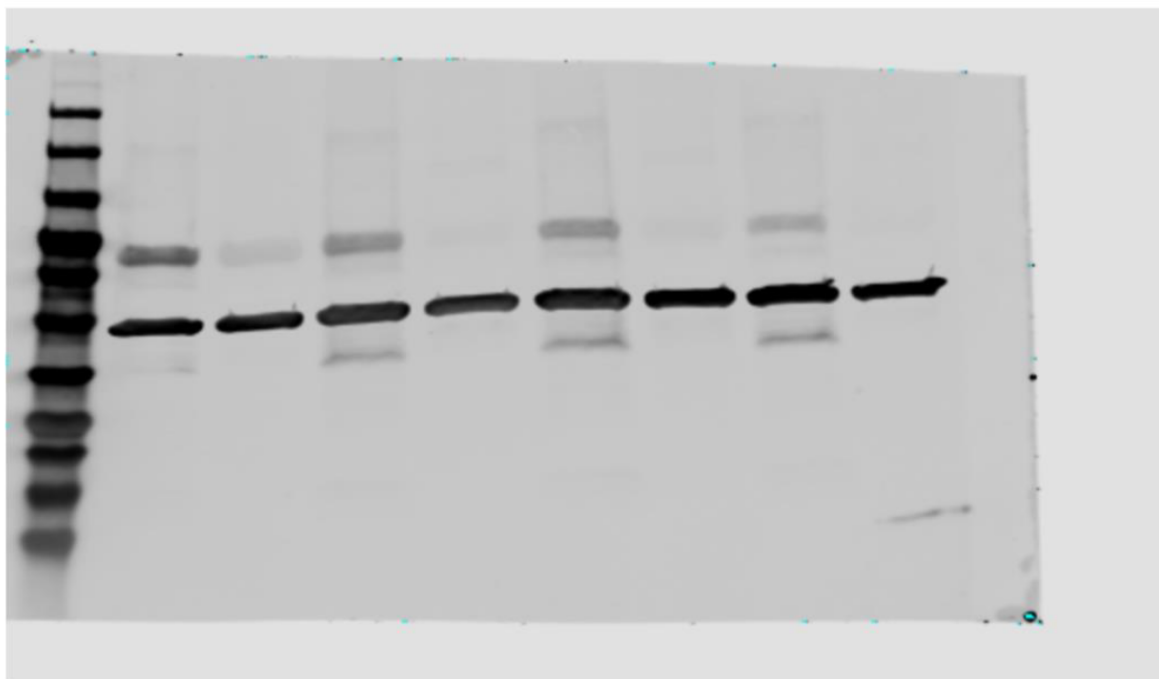

**Supplemental Figure 5.** LI-COR report of raw western blot data. All samples were run and analyzed from a single gel.
